# Supplementary material for: Oxidative Stress Alters miRNA and Gene Expression Profiles in Villous First Trimester Trophoblasts
Source: Biomed Res Int. 2015 Aug 3;2015:257090. doi: 10.1155/2015/257090 (PMC4538339; doi:10.1155/2015/257090)
Supplement: Supplementary file 1 — A complete list of altered miRNAs after 4 hours H2O2 exposure is available in supplementary table 1. [file 257090.f1.xlsx]

## Sheet: Sheet1
Well	miRNA	Fold
10-D01	hsa-miR-3907	-52.3457
5-C10	hsa-miR-21-3p	-12.7286
2-E09	hsa-miR-770-5p	-6.9163
8-B09	hsa-miR-596	-5.6569
9-E04	hsa-miR-3607-5p	-2.9282
5-E08	hsa-miR-324-3p	-2.7702
1-A05	hsa-miR-101-3p	-2.0705
5-G06	hsa-miR-92a-1-5p	2.0139
11-C12	hsa-miR-4301	2.0279
6-A09	hsa-miR-221-5p	2.0562
11-B11	hsa-miR-339-3p	2.0994
3-G03	hsa-miR-495-3p	2.0994
12-G06	hsa-miR-3653	2.1287
3-F01	hsa-miR-502-5p	2.1585
4-E10	hsa-miR-188-3p	2.1886
5-F04	hsa-miR-409-3p	2.2346
2-C01	hsa-miR-421	2.2501
1-E07	hsa-miR-30a-5p	2.2658
9-D09	hsa-miR-320e	2.2658
5-B03	hsa-miR-130b-5p	2.2974
2-A09	hsa-miR-411-5p	2.2974
3-E06	hsa-miR-134	2.3295
4-B03	hsa-miR-342-3p	2.3457
2-C11	hsa-miR-340-5p	2.395
2-C09	hsa-miR-370	2.4116
5-A10	hsa-miR-106b-3p	2.4967
1-A08	hsa-miR-16-5p	2.4967
2-A05	hsa-miR-376b-3p	2.5491
1-G04	hsa-miR-140-3p	2.5669
1-B01	hsa-miR-30c-5p	2.5847
1-G05	hsa-miR-128	2.6208
5-D04	hsa-miR-224-5p	2.639
1-E03	hsa-miR-376c-3p	2.6759
1-E11	hsa-miR-143-3p	2.6945
1-D11	hsa-miR-92a-3p	2.7321
4-E12	hsa-miR-543	2.7895
1-F08	hsa-miR-93-5p	2.7895
5-C02	hsa-miR-193b-5p	2.9079
7-A06	hsa-miR-31-3p	2.9485
3-F02	hsa-miR-452-5p	2.9485
3-C12	hsa-miR-152	3.0105
5-D03	hsa-miR-221-3p	3.0525
1-G03	hsa-miR-29c-3p	3.0525
1-F09	hsa-miR-186-5p	3.0738
1-F04	hsa-miR-222-3p	3.1602
1-A07	hsa-miR-103a-3p	3.1821
1-F07	hsa-miR-17-5p	3.1821
4-B12	hsa-miR-378a-3p	3.1821
4-D05	hsa-miR-337-3p	3.2716
2-C08	hsa-miR-181c-5p	3.3173
2-A02	hsa-miR-214-3p	3.387
9-D06	hsa-miR-27b-5p	3.4105
4-G05	hsa-miR-28-3p	3.4581
1-B08	hsa-miR-425-5p	3.4822
3-D01	hsa-miR-450a-5p	3.5308
4-B07	hsa-miR-329	3.605
1-D03	hsa-miR-29a-3p	3.6553
1-G09	hsa-miR-106b-5p	3.7064
5-A11	hsa-miR-10b-3p	3.8106
3-C02	hsa-miR-20b-5p	3.8371
5-E03	hsa-miR-30a-3p	3.9177
6-F09	hsa-miR-1180	4.0558
3-F11	hsa-miR-130b-3p	4.0558
3-A05	hsa-miR-362-5p	4.084
1-F10	hsa-miR-196b-5p	4.1125
10-D04	hsa-miR-378b	4.1125
3-G08	hsa-miR-662	4.1125
1-B03	hsa-miR-185-5p	4.1699
1-E10	hsa-miR-195-5p	4.1699
9-B05	hsa-miR-10a-3p	4.2281
1-B05	hsa-miR-24-3p	4.2281
2-F08	hsa-miR-576-5p	4.3169
1-C08	hsa-miR-181a-5p	4.4076
3-F12	hsa-miR-454-3p	4.4383
5-A06	hsa-let-7f-2-3p	4.4691
5-A03	hsa-let-7b-3p	4.5002
1-G08	hsa-miR-20a-5p	4.5315
1-C10	hsa-miR-99a-5p	4.5631
1-D08	hsa-miR-423-5p	4.7899
1-C12	hsa-miR-320a	4.8568
4-D03	hsa-miR-432-5p	4.8568
3-B01	hsa-miR-132-3p	4.8906
3-A01	hsa-miR-542-3p	5.0281
4-F03	hsa-miR-151a-3p	5.063
5-A01	hsa-miR-455-3p	5.1694
2-E05	hsa-miR-324-5p	5.2054
2-C12	hsa-miR-330-3p	5.2416
8-C11	hsa-miR-7-1-3p	5.3517
6-B02	hsa-miR-320b	5.4264
5-B06	hsa-miR-138-2-3p	5.4642
2-G07	hsa-miR-615-3p	5.4642
2-G01	hsa-miR-497-5p	5.5404
5-B10	hsa-miR-15b-3p	5.579
2-E08	hsa-miR-376a-3p	5.579
1-E12	hsa-miR-30d-5p	5.6569
5-A04	hsa-let-7d-3p	5.7757
5-E06	hsa-miR-30e-3p	5.7757
8-G11	hsa-miR-181a-2-3p	5.9381
9-G03	hsa-miR-551b-5p	5.9794
1-C11	hsa-miR-28-5p	6.105
2-G08	hsa-miR-365b-3p	6.105
3-F06	hsa-miR-766-3p	6.105
4-E05	hsa-miR-193a-5p	6.2333
2-E12	hsa-miR-433	6.2333
9-C01	hsa-miR-493-5p	6.2767
1-D07	hsa-miR-374a-5p	6.3643
11-E07	hsa-miR-3687	6.4086
1-F05	hsa-let-7b-5p	6.6346
10-D08	hsa-miR-3194-5p	6.6346
1-B07	hsa-miR-146a-5p	6.6807
1-A06	hsa-let-7d-5p	6.7272
1-B12	hsa-miR-21-5p	6.8211
1-B09	hsa-miR-181b-5p	6.8685
1-D01	hsa-miR-125a-5p	7.3107
9-B10	hsa-miR-15a-3p	7.3615
4-F05	hsa-miR-181d	7.3615
1-E08	hsa-miR-23b-3p	7.3615
2-G12	hsa-miR-148b-3p	7.4643
4-D07	hsa-miR-218-5p	7.4643
4-D10	hsa-miR-98-5p	7.5162
3-D03	hsa-miR-361-5p	7.5685
3-C08	hsa-miR-146b-5p	7.6741
10-G09	hsa-miR-296-3p	7.6741
1-G01	hsa-miR-130a-3p	7.8354
12-E02	hsa-miR-3714	7.8899
1-A04	hsa-miR-27b-3p	8.1117
2-F01	hsa-miR-501-5p	8.1117
11-D12	hsa-miR-3651	8.3977
1-C05	hsa-miR-194-5p	8.5742
10-B01	hsa-miR-4294	8.5742
1-C09	hsa-miR-125b-5p	8.8152
10-E11	hsa-miR-654-5p	8.8766
8-A03	hsa-miR-23a-5p	9.0005
1-E01	hsa-miR-25-3p	9.0005
8-E05	hsa-miR-1273a	9.1261
10-A04	hsa-miR-154-5p	9.1261
1-C01	hsa-miR-30e-5p	9.3179
1-E09	hsa-miR-151a-5p	9.5137
6-A11	hsa-miR-299-5p	9.5798
9-G01	hsa-miR-323b-3p	9.5798
8-A08	hsa-miR-335-3p	9.5798
2-G06	hsa-miR-187-3p	9.9177
1-C03	hsa-miR-15b-5p	10.0561
3-G04	hsa-miR-335-5p	10.1965
2-B01	hsa-miR-382-5p	10.2674
1-G11	hsa-miR-100-5p	10.6295
8-G02	hsa-miR-3131	10.6295
2-F05	hsa-miR-744-5p	10.7034
1-E04	hsa-miR-126-3p	10.7779
1-C02	hsa-miR-200c-3p	10.7779
2-B12	hsa-miR-192-5p	11.1579
2-D02	hsa-miR-379-5p	11.8762
9-D02	hsa-miR-2278	11.9588
1-G02	hsa-let-7c	12.1257
1-E06	hsa-miR-424-5p	12.1257
8-G08	hsa-miR-3916	12.3805
3-G09	hsa-miR-942	12.6407
1-F02	hsa-let-7i-5p	12.996
5-D10	hsa-miR-29b-1-5p	13.0864
10-C04	hsa-miR-16-2-3p	14.1232
5-B02	hsa-miR-126-5p	14.3204
12-A09	hsa-miR-4300	14.8254
1-D12	hsa-miR-23a-3p	14.9285
1-A09	hsa-miR-26a-5p	15.5625
1-B06	hsa-miR-155-5p	15.7797
8-C08	hsa-miR-656	15.7797
1-F01	hsa-miR-191-5p	15.8895
1-G10	hsa-miR-7-5p	16.4498
2-C06	hsa-miR-628-3p	17.1484
10-E10	hsa-miR-4291	18.6357
8-A06	hsa-miR-26a-2-3p	20.6776
12-D11	hsa-miR-3135a	20.9663
7-F03	hsa-miR-1244	24.0839
1-A02	hsa-miR-9-5p	24.59
11-E11	hsa-miR-941	25.9921
2-E03	hsa-miR-18b-5p	27.2843
6-F06	hsa-miR-99b-3p	28.443
2-D12	hsa-miR-190a	28.6408
8-E03	hsa-miR-1271-5p	29.0406
8-B04	hsa-miR-505-5p	30.6965
2-F07	hsa-miR-10b-5p	34.5353
8-C09	hsa-miR-661	36.2523
2-B04	hsa-miR-196a-5p	37.7918
8-G06	hsa-miR-3191-3p	41.9326
1-E02	hsa-let-7e-5p	42.8137
5-F12	hsa-miR-490-3p	44.3235
2-D03	hsa-miR-10a-5p	44.9422
2-E11	hsa-miR-563	49.5221
1-A12	hsa-let-7g-5p	49.8665
4-A09	hsa-miR-637	51.6251
11-A03	hsa-miR-1911-3p	82.1393
1-A11	hsa-miR-26b-5p	91.1392
8-C02	hsa-miR-615-5p	92.4115
1-D09	hsa-let-7a-5p	107.635
1-G06	hsa-let-7f-5p	107.635
